# Supplementary material for: Trinucleotide repeat expansions catalyzed by human cell-free extracts
Source: PubMed Central journal article supplement — Cell Res. 2013 Jan 22;23(4):565–72. doi: 10.1038/cr.2013.12 (PMC3616437; doi:10.1038/cr.2013.12), 2013-01-22
Supplement: cr201312x1.pdf [file cr201312x1.pdf]

**Table S1. Expansion frequency data for Fig 4A**

| Sequence                                 | ori status | Extract <sup>a</sup> | n | Average        | SEM            | p vs no extract |
|------------------------------------------|------------|----------------------|---|----------------|----------------|-----------------|
| (CTG) <sub>22</sub>                      | +          | 30 ug                | 5 | 3.1E-03        |                | <b>0.01</b>     |
|                                          | +          | 0 ug                 | 5 | 7.0E-04        |                |                 |
|                                          | +          | 30 ug - 0 ug         |   | <b>2.4E-03</b> | <b>9.0E-04</b> |                 |
| (CTG) <sub>22</sub>                      | -          | 30 ug                | 5 | 7.0E-03        |                | <b>0.02</b>     |
|                                          | -          | 0 ug                 | 5 | 1.7E-03        |                |                 |
|                                          | -          | 30 ug - 0 ug         |   | <b>5.3E-03</b> | <b>2.1E-03</b> |                 |
| (CAG) <sub>22</sub>                      | +          | 30 ug                | 4 | 9.4E-04        |                | <b>0.004</b>    |
|                                          | +          | 0 ug                 | 4 | 2.4E-04        |                |                 |
|                                          | +          | 30 ug - 0 ug         |   | <b>7.0E-04</b> | <b>1.0E-04</b> |                 |
| (C,T,G) <sub>6</sub> (CTG) <sub>16</sub> | +          | 30 ug                | 4 | 1.2E-03        |                | <b>0.07</b>     |
|                                          | +          | 0 ug                 | 4 | 4.0E-04        |                |                 |
|                                          | +          | 30 ug - 0 ug         |   | <b>8.0E-04</b> | <b>4.0E-04</b> |                 |

**Bold** values were reported in Fig 4A

<sup>a</sup> 30 µg Extract includes addition of 2 µg large T antigen
